# Supplementary material for: Biodegradable nanocomposite fibrous scaffold mediated local delivery of vancomycin for the treatment of MRSA infected experimental osteomyelitis
Source: Royal Society of Chemistry journal article supplement (doi:10.1039/d0bm00140f), 2020-01-01
Supplement: d0bm00140f1.pdf [file d0bm00140f1.pdf]

**Electronic Supplementary Information**

**Biodegradable nanocomposite fibrous scaffold mediated local delivery of vancomycin  
for the treatment of MRSA infected experimental osteomyelitis**

Amit G. Krishnan, Raja Biswas, Deepthy Menon, Manitha B. Nair\*

Amrita Centre for Nanosciences and Molecular Medicine, Amrita Institute of Medical  
Sciences and Research Centre, Amrita Vishwa Vidyapeetham, India

**\*Dr. Manitha B. Nair (Corresponding Author)**

Amrita Centre for Nanosciences and Molecular Medicine,  
Amrita Institute of Medical Sciences and Research Centre,  
Amrita Vishwa Vidyapeetham, India  
E-mail: manithanair@aims.amrita.edu

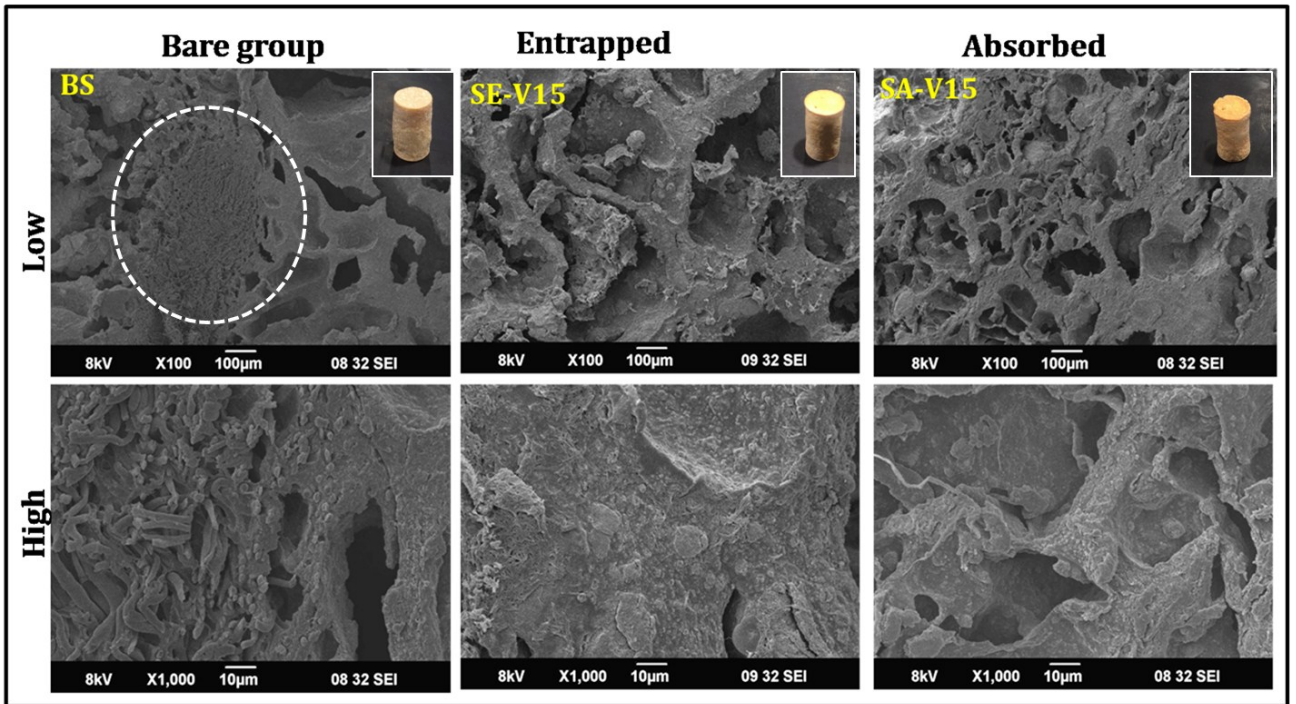

**Fig S1:** Scanning electron micrographs of nanocomposite scaffolds (with and without vancomycin – 15 wt%) at low and high magnification. Images of the scaffolds is given in the inset [white dotted circle represents well integrated PLLA yarns]

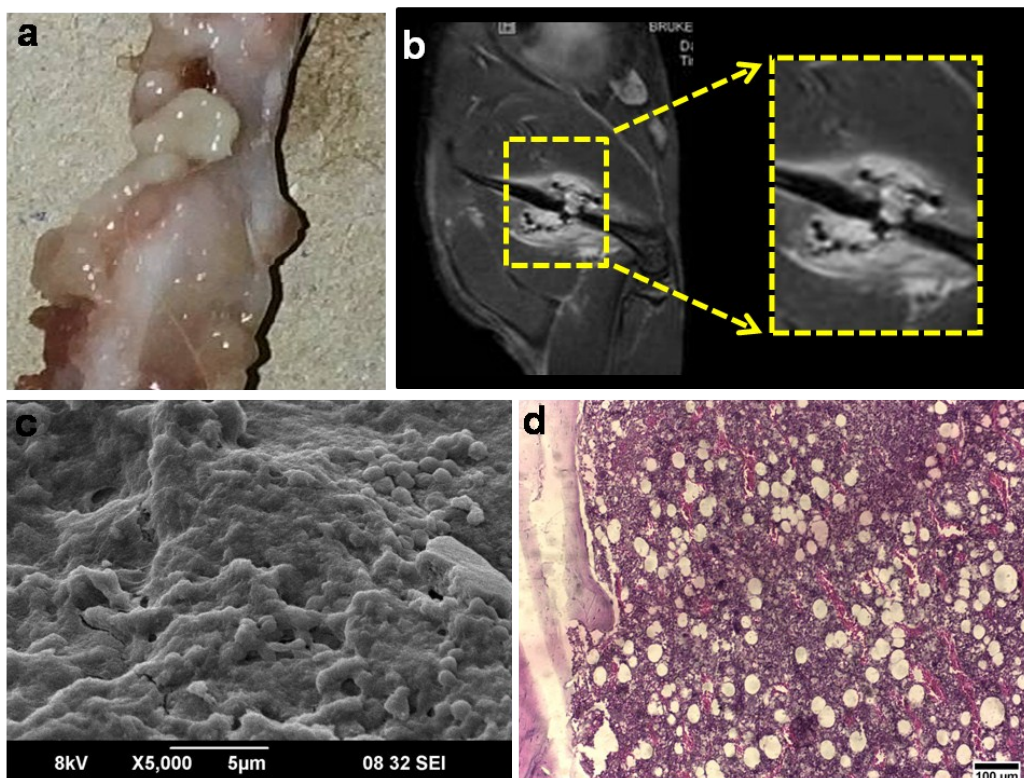

**Fig S2:** Evaluation of osteomyelitic rat femur after 7 days (a) Gross image (b) MRI (c) SEM image (d) Histological section showing abnormal granulocyte infiltration (H&E staining)

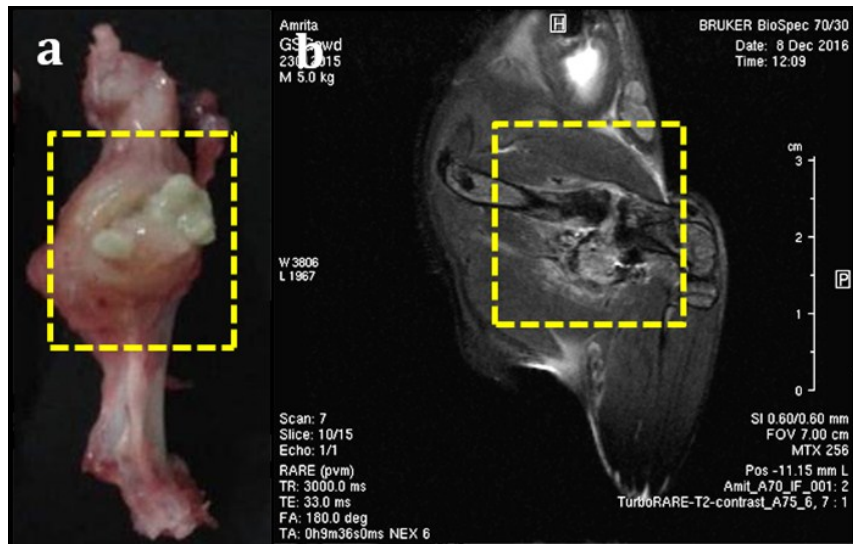

**Fig S3:** Characterisation of infected bone implanted with BS scaffold (scaffold without vancomycin) for 1 month (a) Gross image (b) MRI
